# Supplementary material for: Branched triphenylamine-core compounds: aggregation induced two-photon absorption
Source: Royal Society of Chemistry journal article supplement (doi:10.1039/c6ra09701d), 2016-01-01
Supplement: c6ra09701d1.pdf [file c6ra09701d1.pdf]

## Supporting Information (SI)

### A simple and effective strategy *via* aggregation-induced to improve two-photon absorption

Xin Zhang<sup>a, ξ</sup>, Xiaoping Gan<sup>a, b, ξ</sup>, Shun Yao<sup>a</sup>, Weiju Zhu<sup>a</sup>, Jianhua Yu<sup>a</sup>, Hongping Zhou<sup>a,\*</sup>,  
Yupeng Tian<sup>a</sup>, Jieying Wu<sup>a</sup>

<sup>a</sup>College of Chemistry and Chemical Engineering, Anhui University and Key Laboratory of Functional Inorganic Materials Chemistry of Anhui Province, 230601, Hefei, P.R. China

<sup>b</sup>School of Science, Anhui Agricultural University, 230036, Hefei, P. R. China.

Corresponding author. Fax: +86-551-63861279; Tel: +86-551-63861279

E-mail: [zhpzhp@263.net](mailto:zhpzhp@263.net)

ξ: These authors contributed equally to this work and should be considered co-first authors

**Fig. S1:** The characterization data of compounds **T1**, **T2** and **T3**

**Fig. S2:** Linear absorption (a) and fluorescence (b) spectra of **T2** in five organic solvents with different polarities at a concentration of  $5 \times 10^{-5} \text{ mol L}^{-1}$ .

**Fig. S3:** Linear absorption (a) and fluorescence (b) spectra of **T3** in five organic solvents with different polarities at a concentration of  $5 \times 10^{-5} \text{ mol L}^{-1}$ .

**Fig. S4:** Lippert-Mataga plots for **T1**, **T2** and **T3**.

**Fig. S5:** Particle size distribution of **T2** in mixtures with different water fractions: (a) Water/DMF (40/60, v/v); (b) Water/ DMF (50/50, v/v); (c) Water/ DMF (90/10, v/v).

**Fig. S6:** The 2D layer structures of **T1** and **T2**

**Fig. S7:** The open aperture Z-scan data of **T1** (a) in pure solution and **T3** in aggregates (b) and in pure solution (c)

**Fig. S8:** Photon-bleach experiment of **T1**, **T2** and **T3** over continued laser scanning.

**Table S1:** The linear optical properties of **T1**, **T2** and **T3**.

**Table S2:** The transition dipole moment calculation results of **T1**, **T2** and **T3**

**Table S3:** Crystal data of **T1** and **T2**.

**Fig. S1a:**  $^1\text{H}$  NMR,  $^{13}\text{C}$  NMR and MS spectra of **T1**.

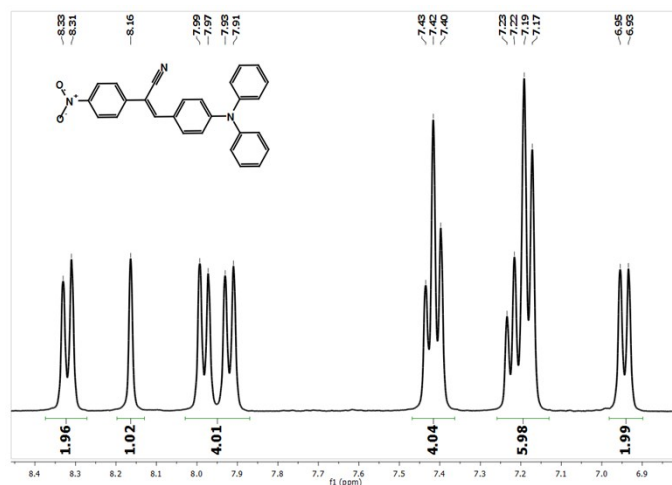

The  $^1\text{H}$  NMR (400MHz) spectra of **T1** in  $\text{DMSO-}d_6$

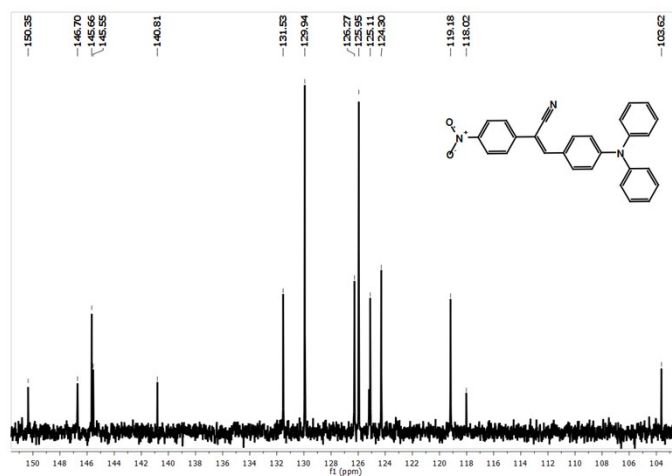

The  $^{13}\text{C}$  NMR (100 MHz) spectra of **T1** in  $\text{DMSO-}d_6$

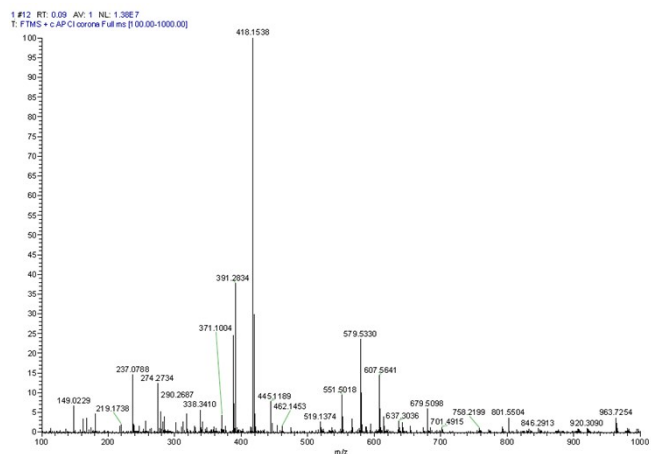

MS of **T1**

Fig. S1b:  $^1\text{H}$  NMR,  $^{13}\text{C}$  NMR and MS spectra of **T2**.

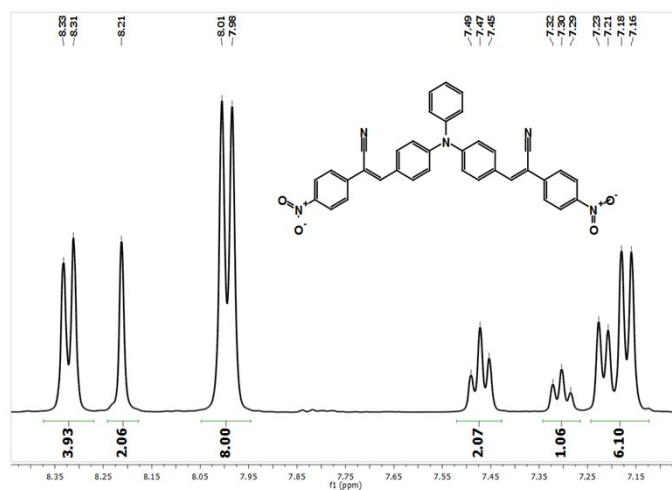

The  $^1\text{H}$  NMR (400MHz) spectra of **T2** in  $\text{DMSO-}d_6$

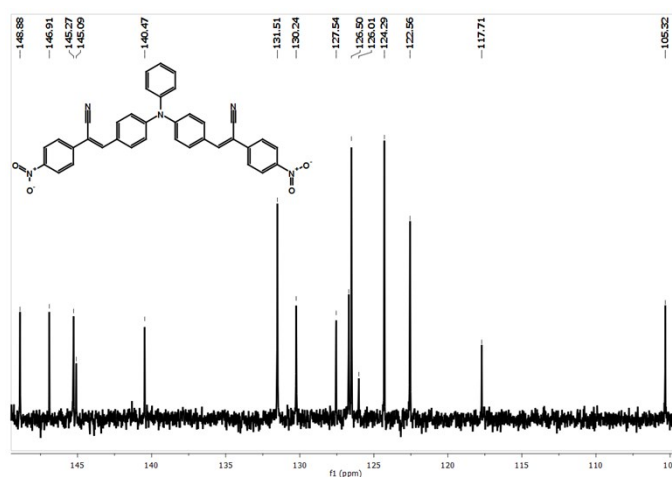

The  $^{13}\text{C}$  NMR (100 MHz) spectra of **T2** in  $\text{DMSO-}d_6$

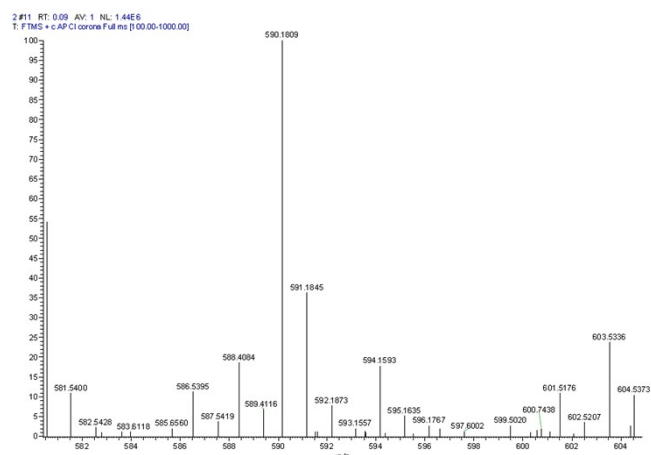

MS of **T2**

**Fig. S1c:**  $^1\text{H}$  NMR,  $^{13}\text{C}$  NMR and MS spectra of **T3**.

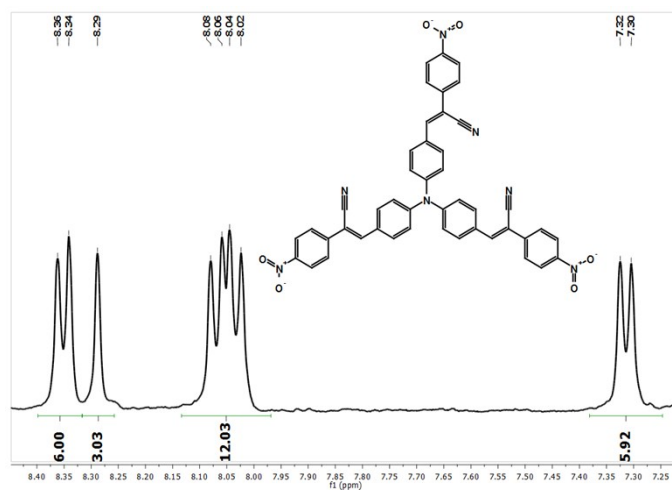

The  $^1\text{H}$ -NMR of **T3** ( $\text{DMSO}-d_6$ , 400 MHz)

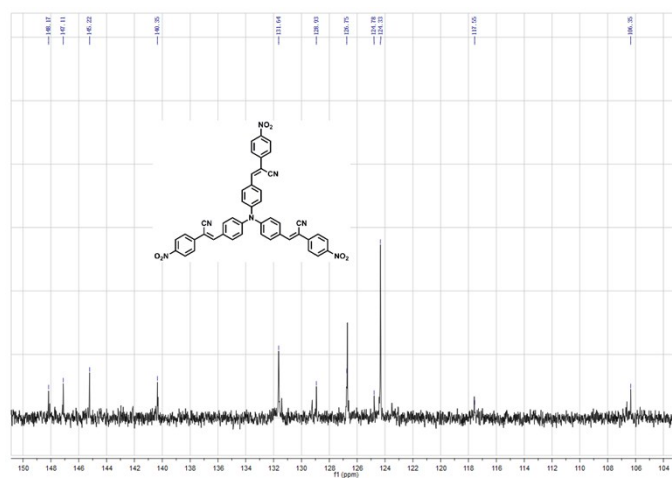

The  $^{13}\text{C}$  NMR (100 MHz) spectra of **T3** in  $\text{DMSO}-d_6$

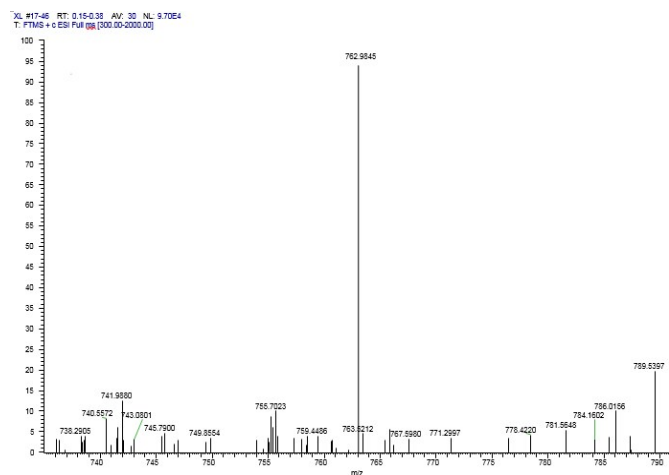

MS of T3

**Fig. S2:** Linear absorption (a) and fluorescence (b) of **T2** in five organic solvents with different polarities at a concentration of  $5 \times 10^{-5} \text{ mol L}^{-1}$ .

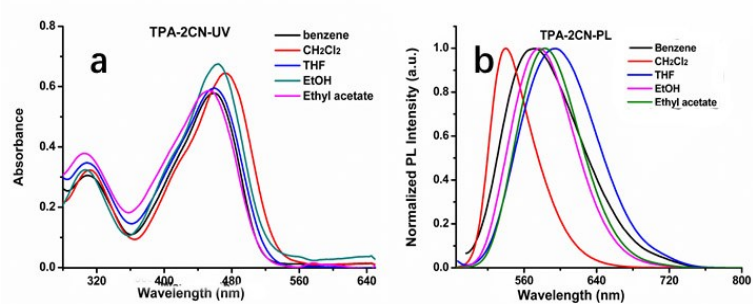

**Fig. S3:** Linear absorption (a) and fluorescence (b) of **T3** in five organic solvents with different polarities at a concentration of  $5 \times 10^{-5} \text{ mol L}^{-1}$ .

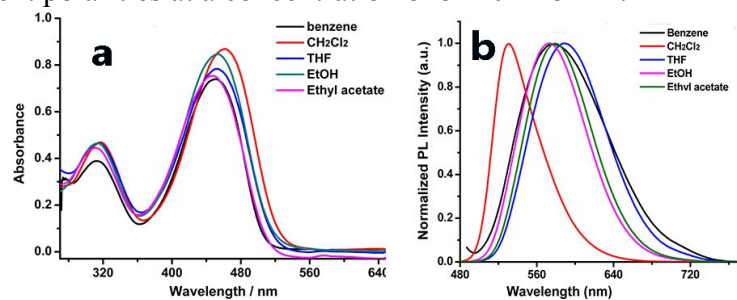

**Fig. S4:** Lippert-Mataga plots for T1, T2 and T3

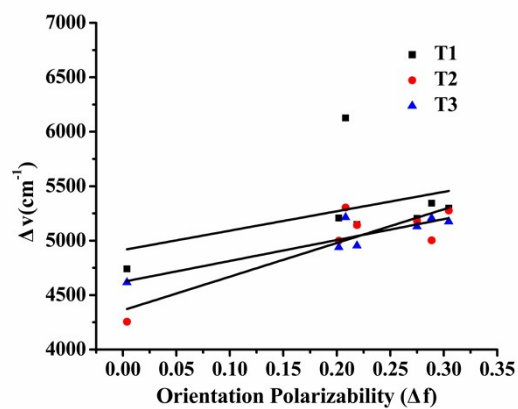

**Fig. S5:** Particle size distribution of T2 in mixtures with different water fractions: (a) Water/DMF (40/60, v/v); (b) Water/DMF (50/50, v/v); (c) Water/DMF (90/10, v/v).

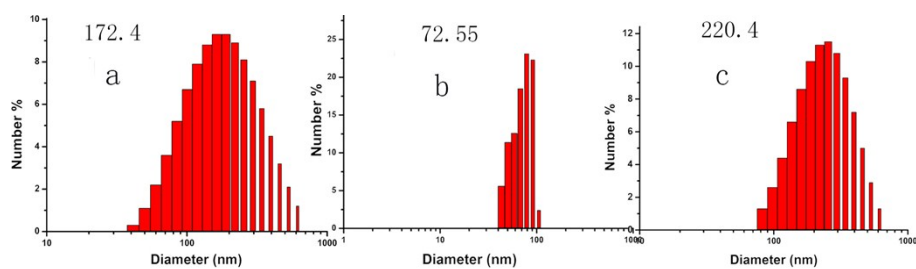

**Fig. S6:** The 2D structures of T1 (a) and T2 (b)

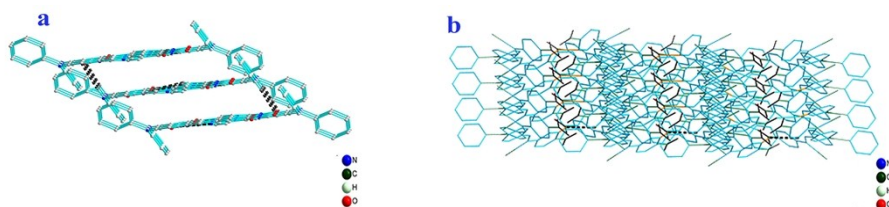

**Fig. S7:** The open aperture Z-scan data of **T1** (a) and **T3** (b, c) in aggregates and in pure solution

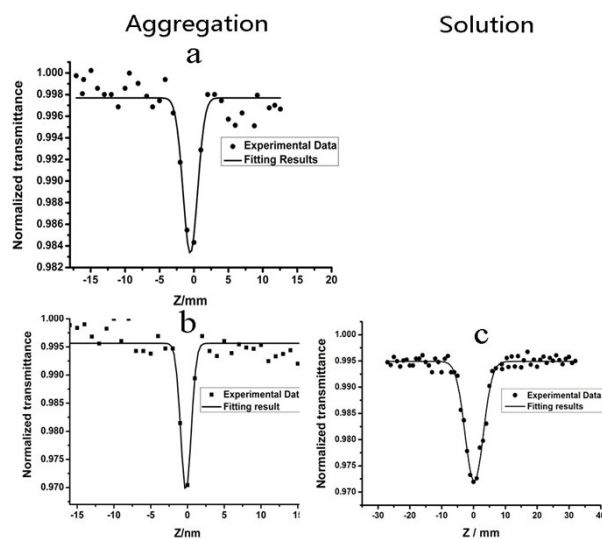

**Fig. S8:** Photon-bleach experiment of **T1**, **T2** and **T3**.

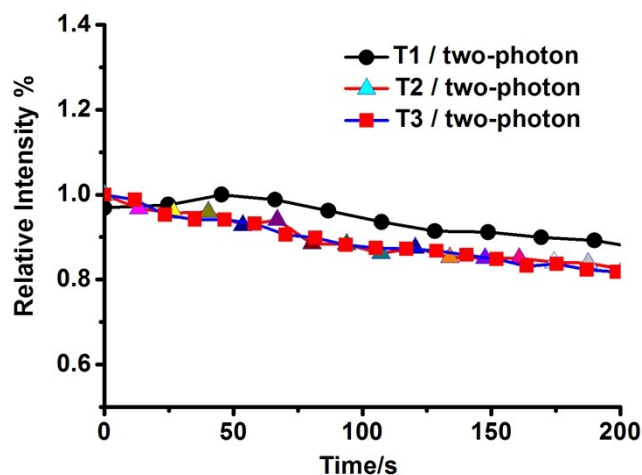

**Table S1:** The Linear absorption properties of **T1**, **T2** and **T3**.

| Compounds | Solvents        | $\lambda_{\max}^{[a]}$ | $\lambda_{\max}^{[b]}$ | $\Delta\nu^{[c]}$ |
|-----------|-----------------|------------------------|------------------------|-------------------|
| <b>T1</b> | Benzene         | 296, 435               | 548                    | 4740.33           |
|           | Dichloromethane | 297, 451               | 549                    | 3958.01           |
|           | Tetrahydrofuran | 294, 434               | 572                    | 5558.96           |
|           | Ethanol         | 293, 441               | 586                    | 5585.21           |
|           | Ethyl acetate   | 293, 426               | 593                    | 6610.77           |
| <b>T2</b> | Benzene         | 310, 460               | 572                    | 4256.61           |
|           | Dichloromethane | 312, 472               | 540                    | 2667.92           |
|           | Tetrahydrofuran | 309, 460               | 594                    | 4904.11           |
|           | Ethanol         | 307, 463               | 577                    | 4267.25           |
|           | Ethyl acetate   | 306, 453               | 583                    | 4922.40           |

|           |                 |          |     |         |
|-----------|-----------------|----------|-----|---------|
| <b>T3</b> | Benzene         | 312, 450 | 568 | 4616.59 |
|           | Dichloromethane | 317, 461 | 531 | 2859.58 |
|           | Tetrahydrofuran | 315, 451 | 588 | 5166.15 |
|           | Ethanol         | 313, 453 | 573 | 4623.05 |
|           | Ethyl acetate   | 307, 454 | 580 | 4785.05 |

<sup>a</sup> Absorption peak position in nm ( $5 \times 10^{-5}$  mol L<sup>-1</sup>). <sup>b</sup> Emission Peak position of **T1-T3** in nm ( $5 \times 10^{-5}$  mol L<sup>-1</sup>), excited at the absorption maximum. <sup>c</sup> Stokes shift in cm<sup>-1</sup>.

**Table S2:** The transition dipole moment calculation results of **T1**, **T2** and **T3**

| Compounds | Angstrom radius with optimized structure(Å) | $\mu_e - \mu_g$ (D) |
|-----------|---------------------------------------------|---------------------|
| <b>T1</b> | 5.66                                        | 4.79                |
| <b>T2</b> | 6.27                                        | 8.35                |
| <b>T3</b> | 6.99                                        | 6.42                |

**Table S3:** Crystal data of compounds **T1** and **T2**

| Compounds                                       | <b>T1</b>                                                     | <b>T2</b>                                                     |
|-------------------------------------------------|---------------------------------------------------------------|---------------------------------------------------------------|
| Empirical formula                               | C <sub>27</sub> H <sub>19</sub> N <sub>3</sub> O <sub>2</sub> | C <sub>36</sub> H <sub>23</sub> N <sub>5</sub> O <sub>4</sub> |
| Formula weight                                  | 417.45                                                        | 589.59                                                        |
| Crystal system                                  | Monoclinic                                                    | Monoclinic                                                    |
| Space group                                     | P2(1)/c                                                       | C2/c                                                          |
| a[Å]                                            | 11.165(5)                                                     | 34.868(3)                                                     |
| b[Å]                                            | 7.545(5)                                                      | 9.7729(9)                                                     |
| c[Å]                                            | 25.708(5)                                                     | 29.980(3)                                                     |
| $\alpha$ [°]                                    | 90.000(5)                                                     | 90                                                            |
| $\beta$ [°]                                     | 96.505(5)                                                     | 119.721(3)                                                    |
| $\gamma$ [°]                                    | 90.000(5)                                                     | 90                                                            |
| <i>V</i> [Å <sup>3</sup> ]                      | 2151.7 (18)                                                   | 8871.9(15)                                                    |
| <i>Z</i>                                        | 4                                                             | 12                                                            |
| <i>T</i> [K]                                    | 296(2)                                                        | 296(2)                                                        |
| <i>D</i> <sub>calcd</sub> [g·cm <sup>-3</sup> ] | 1.289                                                         | 1.055                                                         |
| F(000)                                          | 872                                                           | 884                                                           |
| $\mu$ [mm <sup>-1</sup> ]                       | 0.08                                                          | 0.089                                                         |
| $\theta$ range[°]                               | 2.6–22.3                                                      | 1.34–25.00                                                    |
| Total no. data                                  | 14789                                                         | 30908                                                         |
| No. unique data                                 | 3774                                                          | 7833                                                          |
| <i>R</i> <sub>int</sub>                         | 0.030                                                         | 0.0489                                                        |
| <i>R</i> <sub>1</sub>                           | 0.0454                                                        | 0.0515                                                        |
| <i>wR</i> <sub>2</sub>                          | 0.1559                                                        | 0.1475                                                        |
| GOF                                             | 1.136                                                         | 0.919                                                         |
